# Supplementary material for: Cancer genome datamining and functional genetic analysis implicate mechanisms of ATM/ATR dysfunction underpinning carcinogenesis
Source: PubMed Central journal article supplement (PMC7979806; doi:10.1038/s42003-021-01884-x), 2021-03-19

# FIGURE 1 – EW 1

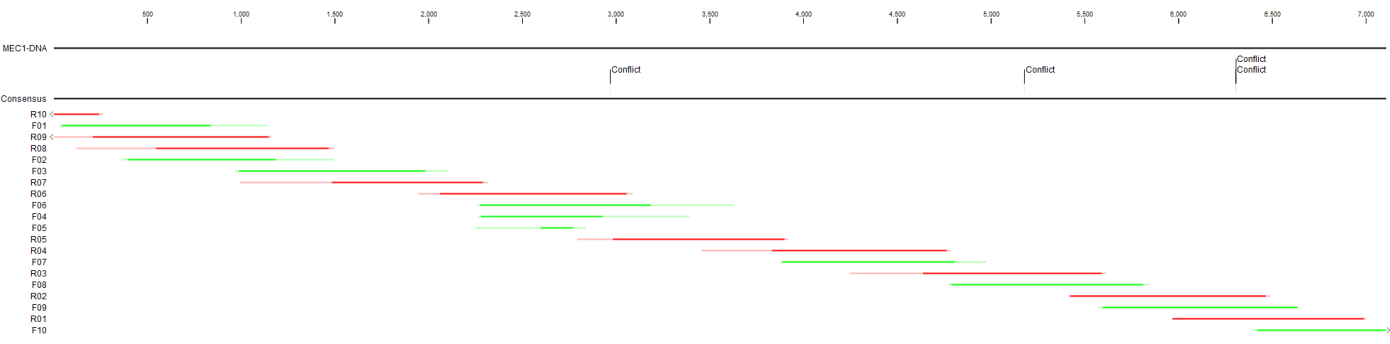

2967 C→T (silent)

5177 C→T (A1726V)

6303 G→A (silent)

6305 G→A (S2102N)

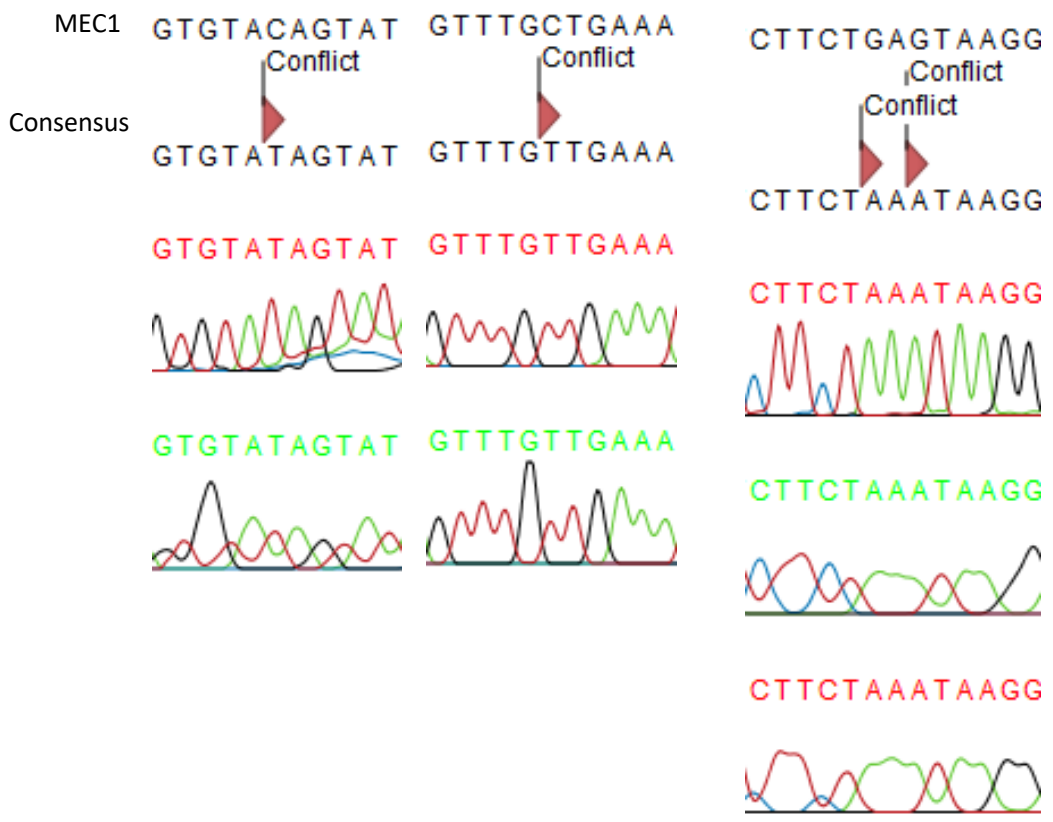

# FIGURE 2 – EW 2

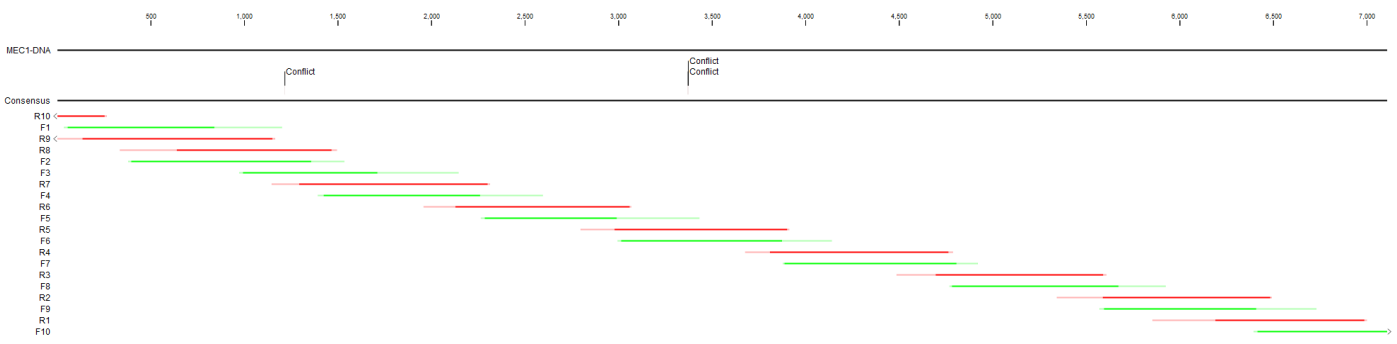

1215 C→T (silent)

TTTAACAAGAC  
 Conflict  
 TTTAATAAGAC

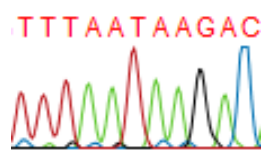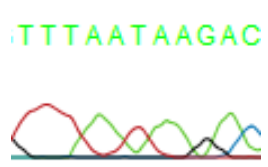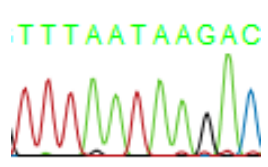

3370 G→A (G1124N)  
 3371 G→A

TGATTGGTGTTT  
 Conflict  
 Conflict  
 TGATTAATGTTT

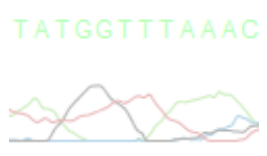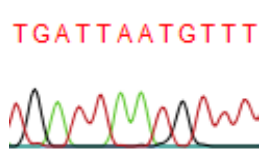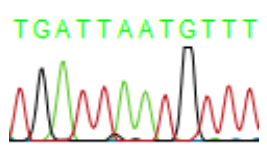

# FIGURE 3 – EW 3

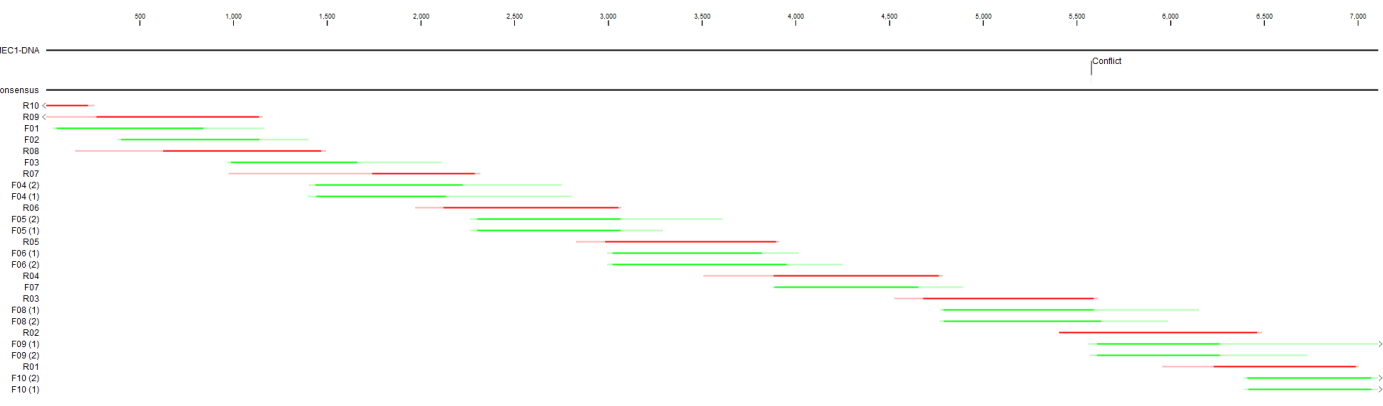

5576 C→T (G1124N)

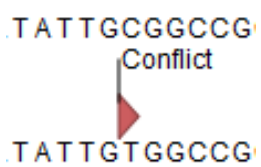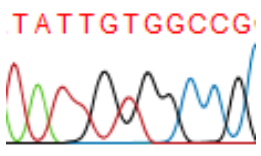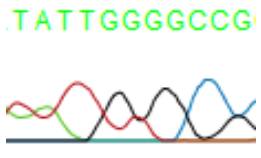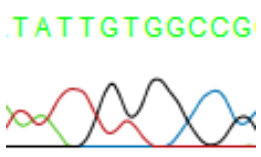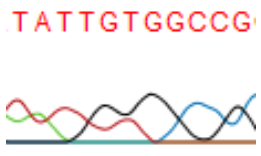

# FIGURE 4 – EW 4

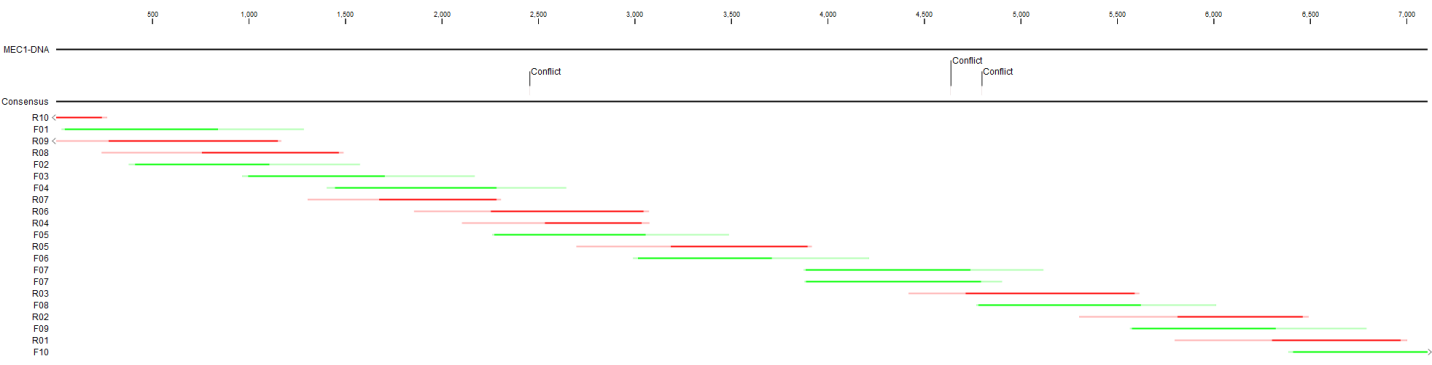

2454 G→A (silent)

ACGAAGCTCTA  
Conflict  
ACGAAACTCTA

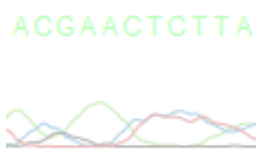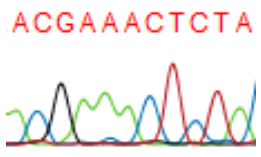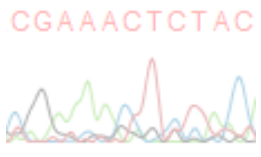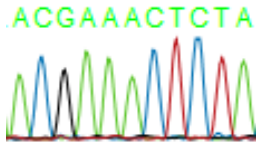

4636 G→A (G1546S)

TAGAAGGCAAT  
Conflict  
TAGAAAGCAAT

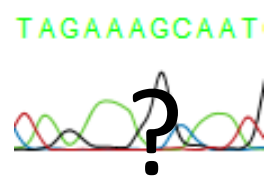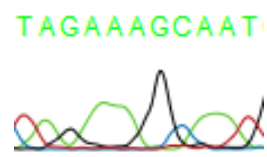

5447 G→A (silent)

TTTAGGCTTAT  
Conflict  
TTTAGACTTAT

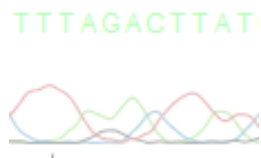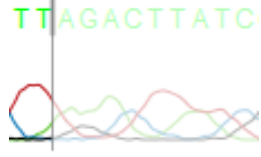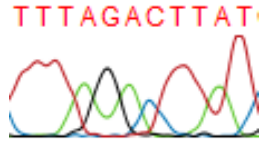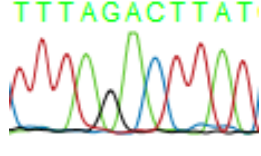

# FIGURE 5 – EW 5 (missing R8)

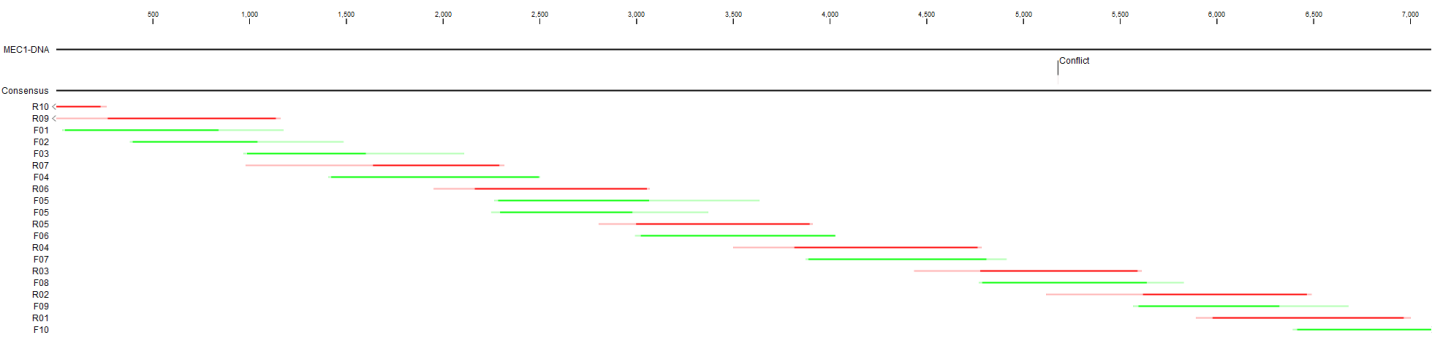

5177 C→T (A1726V)

GTTTGCTGAAA  
Conflict  
GTTTGTTGAAA

GTTTGTTGAAA

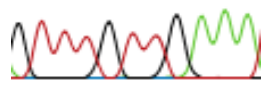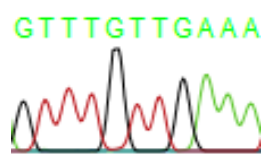

# FIGURE 6 – EW 6

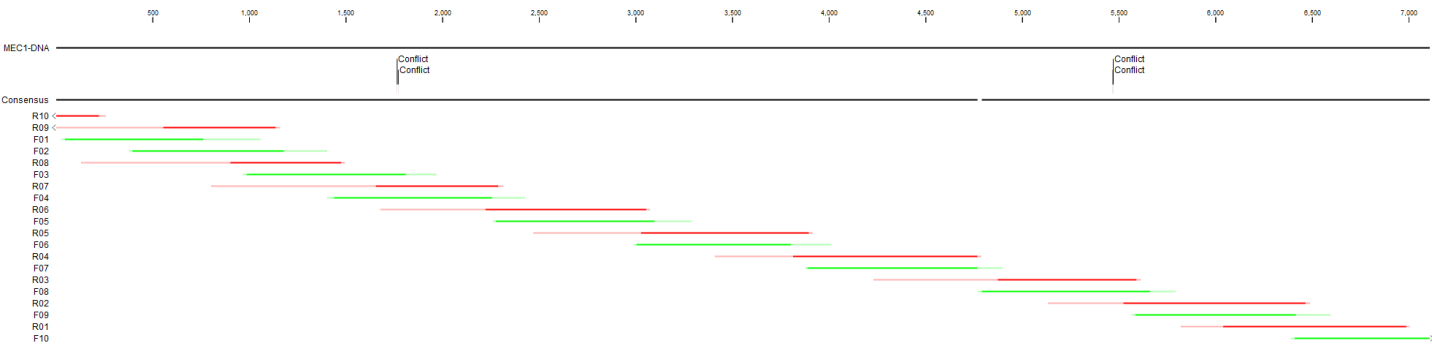

1763 G→A (S588N)      5467 G→A (G1823N)  
 1769 G→A (R590K)      5468 G→A

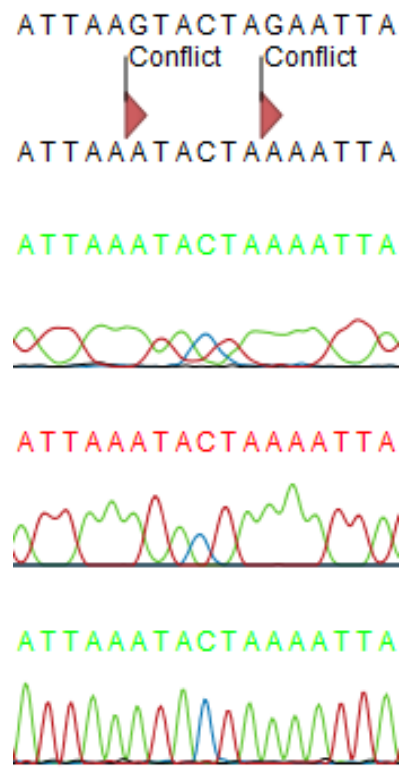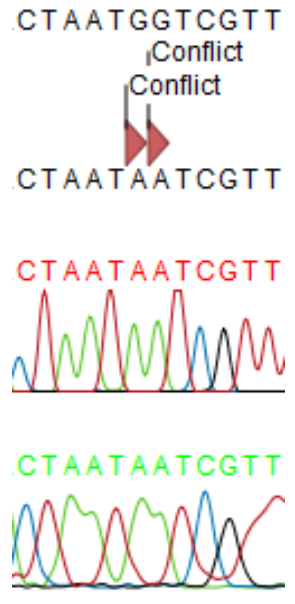

Poor coverage:

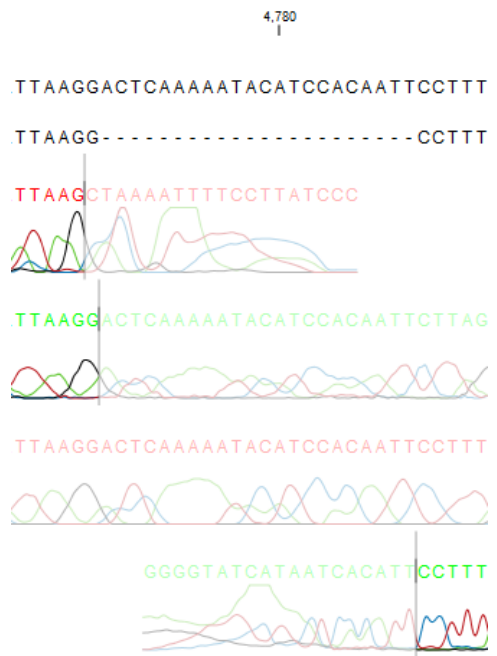

# FIGURE 7 – EW 7

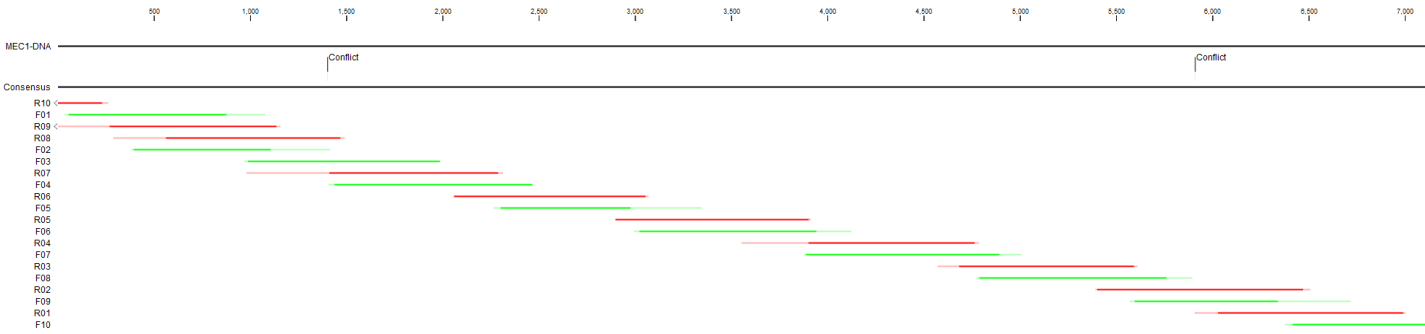

1400 G→A (C467Y)

5908 C→T (silent)

AGCCTGTCTAG

ATGATCTAGTT

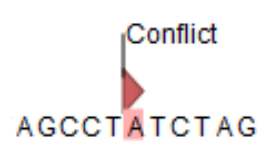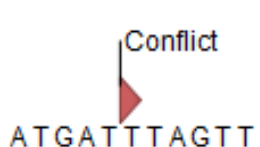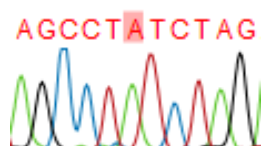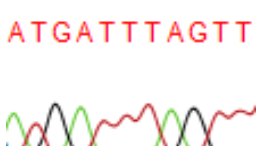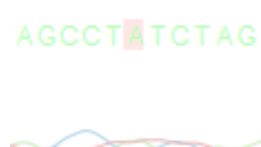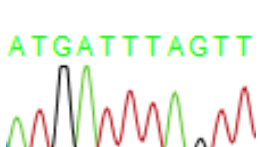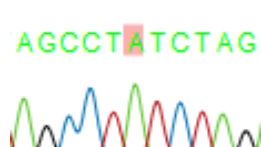

Poor coverage:

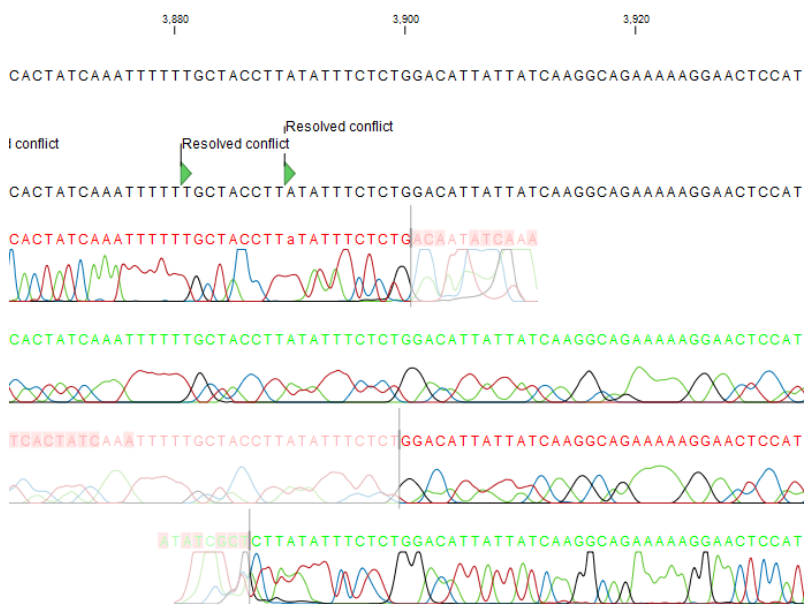

# FIGURE 8 – EW10

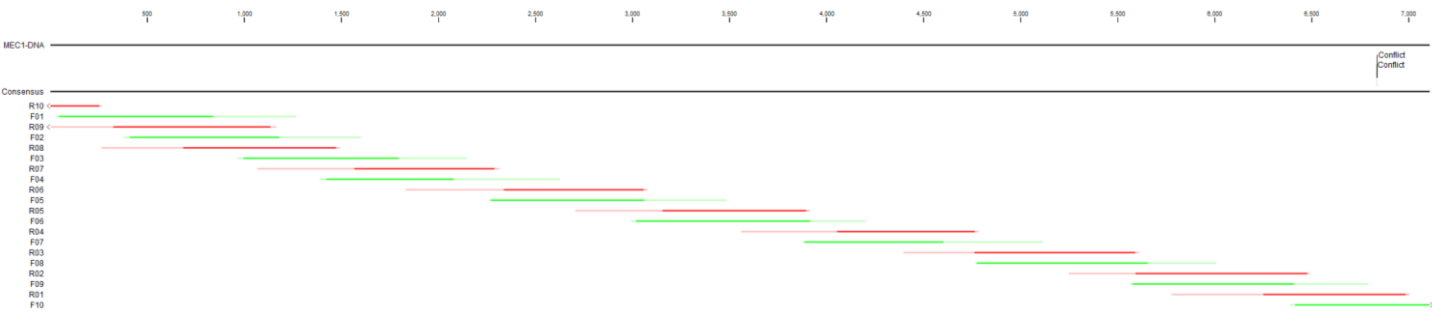

6835 G→A (G2279K)  
6836 G→A (G2279K)

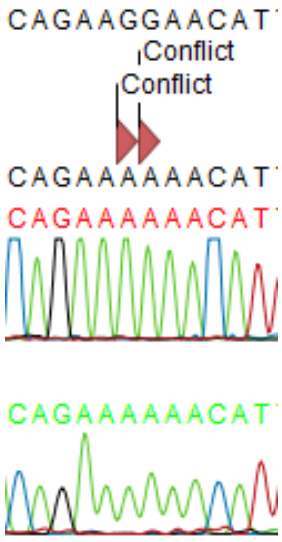



# FIGURE 9 – EW 15

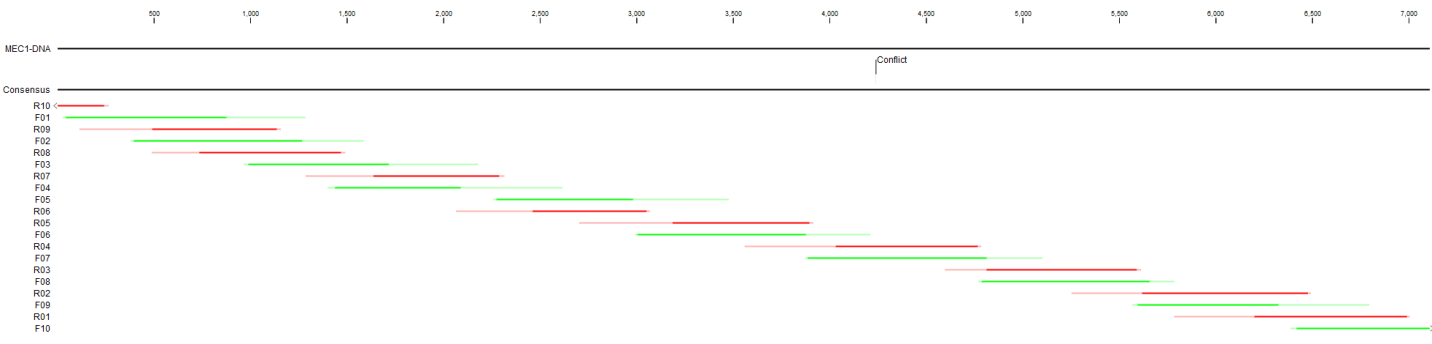

4238 C→T (S1413F)

AAGGTCTGCTC

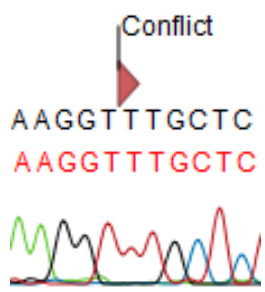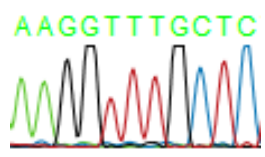

Poor coverage:

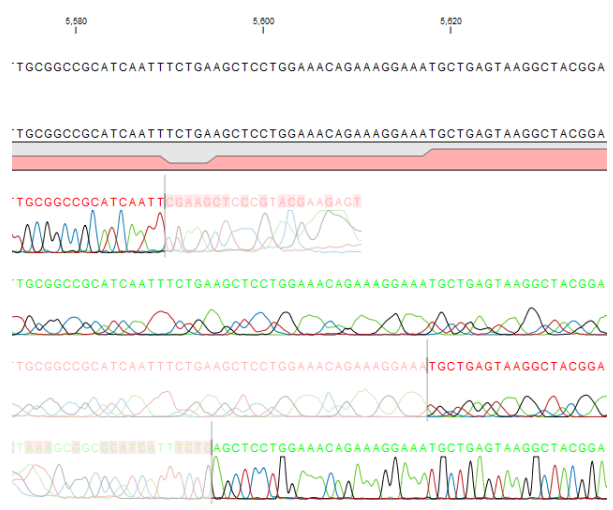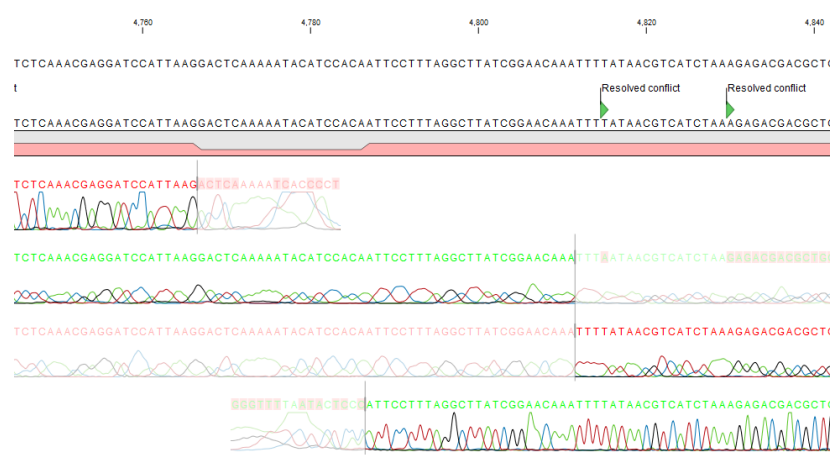

# FIGURE 10 – EW 21

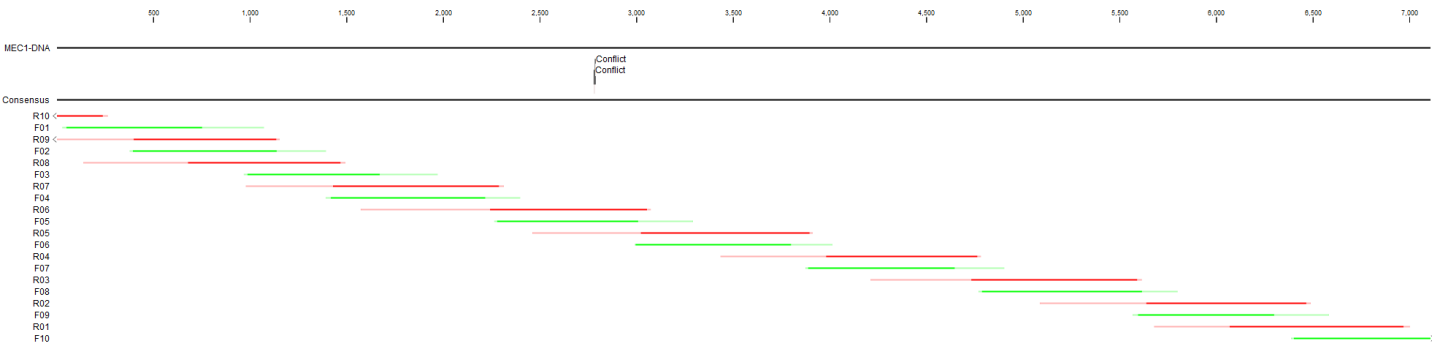

2779 G→A (A927T)  
 2784 G→A (silent)

C A T T A G C C C A G A T T A G  
 Conflict      Conflict  
 C A T T A A C C C A A A T T A G

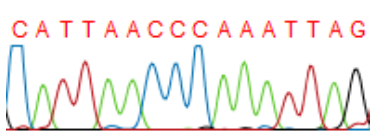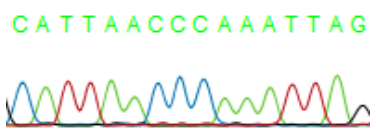

# FIGURE 11 – EW 23

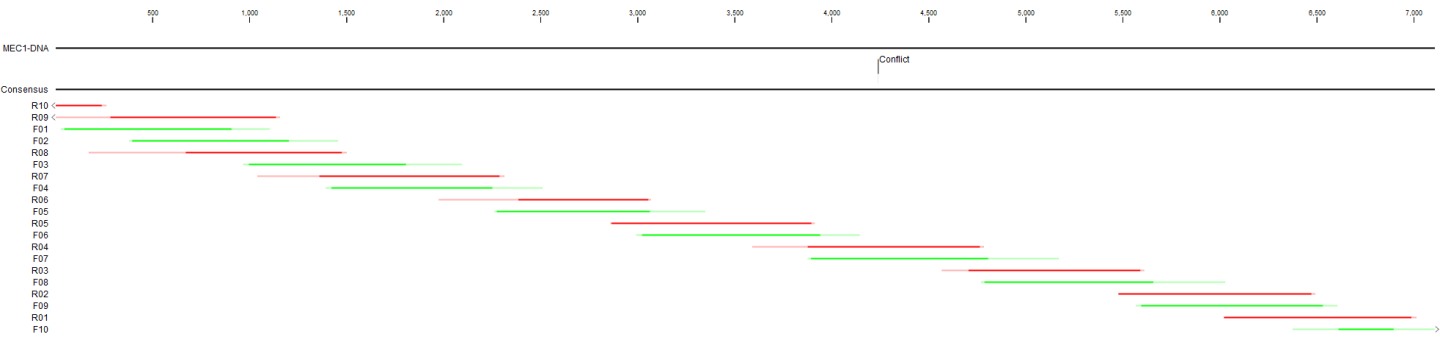

4238 C→T (S1413F)

AAGGTCTGCTC

Conflict  
AAGGTTTGCTC

AAGGTTTGCTC

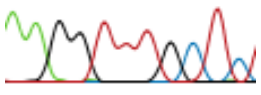

AAGGTTTGCTC

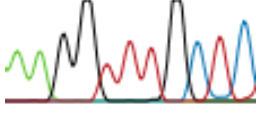

# FIGURE 12 – EW 29

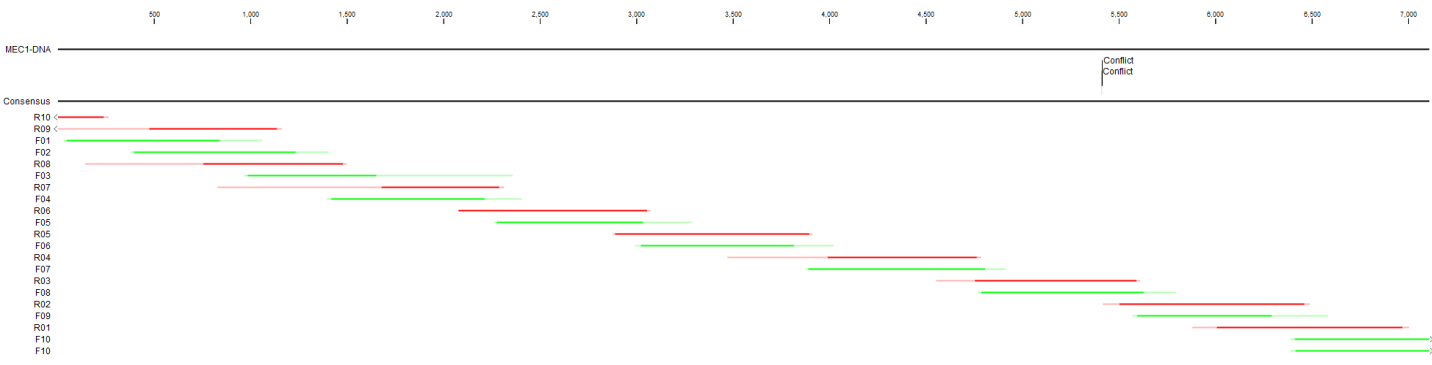

5410 G→A (G1804N)

5411 G→A (G1804N)

CTATTGGCTTAT

Conflict  
Conflict

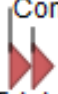

CTATTA ACTTAT

CTATTA ACTTAT

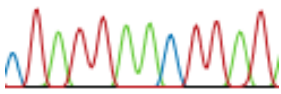

CTATTA ACTTAT

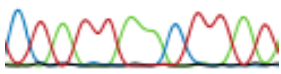

# FIGURE 13 – EW 32

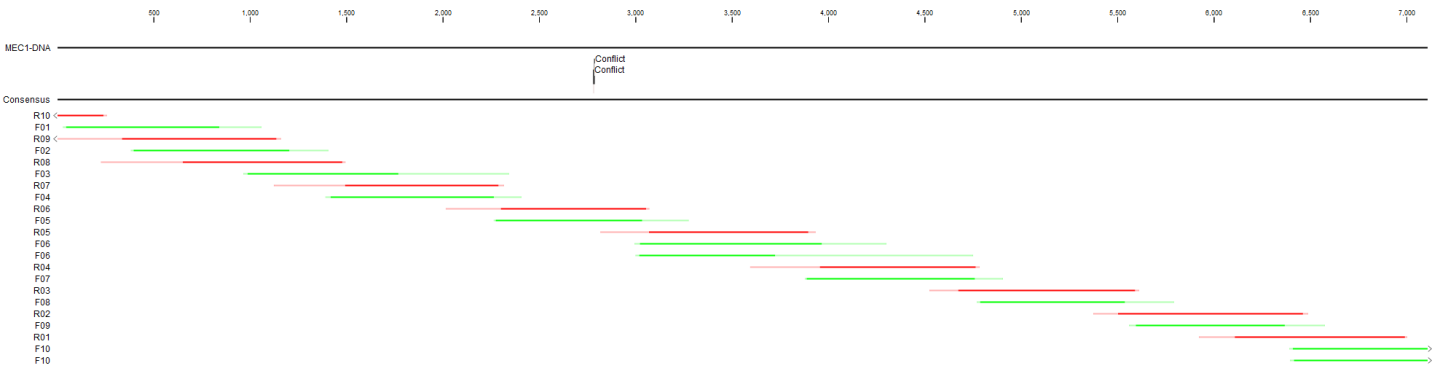

2779 G→A (A927T)

2784 G→A (silent)

CATTAGCCCAGATTAG

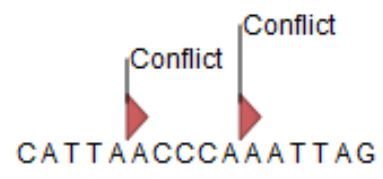

CATTAACCCAAATTAG

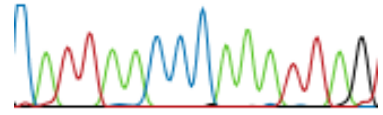

CATTAACCCAAATTAG

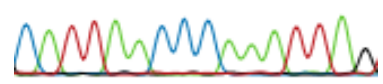

# FIGURE 14 – EW 33

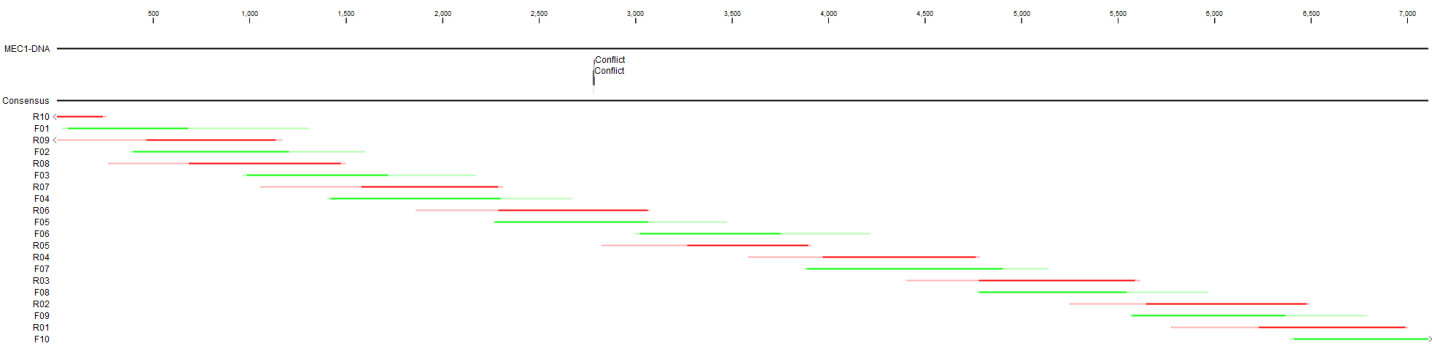

2779 G→A (A927T)  
2784 G→A (silent)

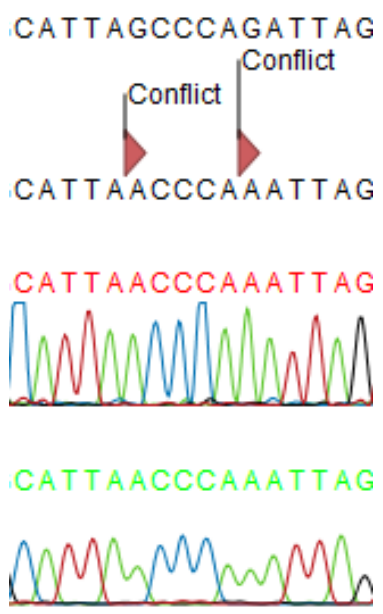

# FIGURE 15 – EW 39

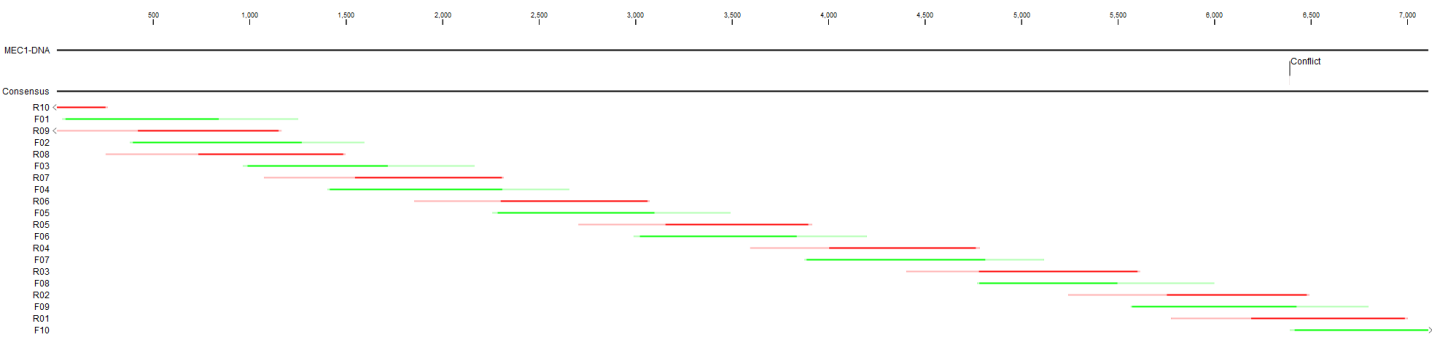

6388 G→A (E2130K)

TATTGGAAATG  
Conflict  
TATTGAAAATG

Detailed description: This diagram illustrates the mutation. The top line shows the reference sequence 'TATTGGAAATG'. A red arrow points from the 'G' at the 6th position to the 'A' in the sequence below, 'TATTGAAAATG'. The word 'Conflict' is written above the arrow.

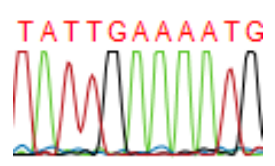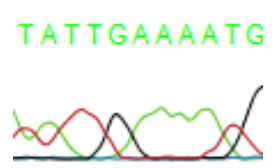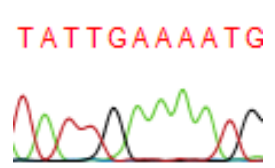

# FIGURE 16 – EW 40

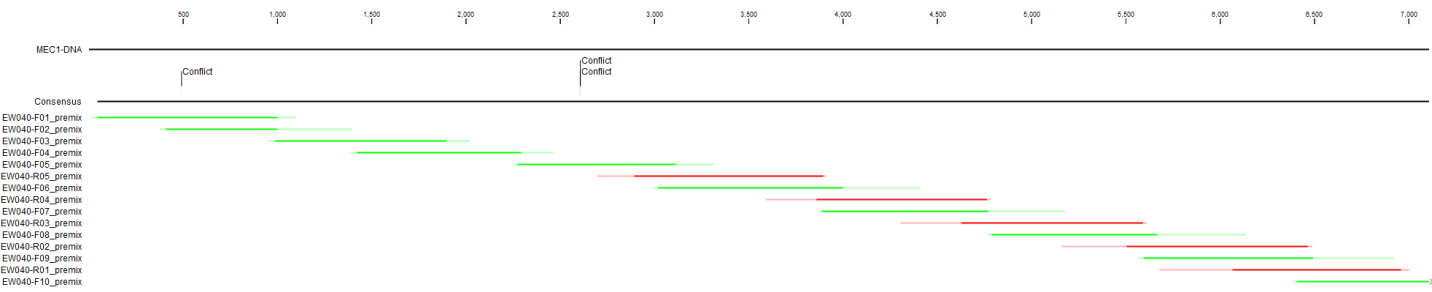

490 G→A (V164I)

2604 G→A (Silent)  
2605 G→T (E867X)

CTGAAGTCTTG

GATCAGGAACAA

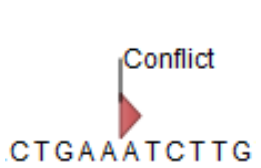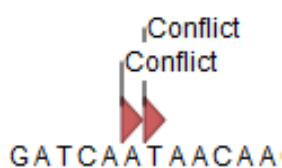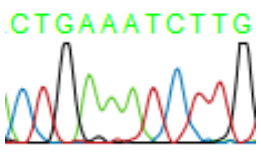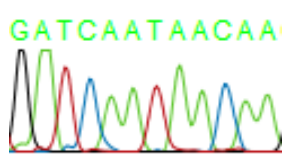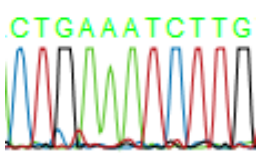

Supplement: 42003_2021_1884_MOESM8_ESM.pdf [file 42003_2021_1884_MOESM8_ESM.pdf]
