# Supplementary material for: Cancer genome datamining and functional genetic analysis implicate mechanisms of ATM/ATR dysfunction underpinning carcinogenesis
Source: PubMed Central journal article supplement (PMC7979806; doi:10.1038/s42003-021-01884-x), 2021-03-19
Supplement: 42003_2021_1884_MOESM9_ESM.pdf [file 42003_2021_1884_MOESM9_ESM.pdf]

|      |                                                               |      |               |
|------|---------------------------------------------------------------|------|---------------|
| MEC1 | -----NSWT--DD-----QEQAFQKKLQDNILG-----IF                      | 884  |               |
| ATR  | -----GLSILASFASDD--PYQGP---RDIISPPELMADYLQPKLLG-----IL        | 1131 |               |
| ATM  | -----SSASQSTDLCDGDFSGDLDPAP--NPHFPFHVIKATFAYISNCHK----TKLSIL  | 1405 |               |
| TEL1 | WIIRFTDLGSLTELRSTVEKLFPTSYLSPYLFENSSVSMRYQYPLHIPLALGATLVQTQF  | 1274 |               |
| MEC1 | Q-----VFSSDIHDVEGRTTYEYKLRVING-ISFLIYAP-----                  | 918  |               |
| ATR  | A-----FFNMQLLSSSV--GIEDKMALNSLMSLMKMGF-----                   | 1164 |               |
| ATM  | EILSKSPDSYQKILLAIQEAETNNVYKHR----ILKIYHLFVSLLLKDIKSGLGGAW     | 1461 |               |
| TEL1 | AHEKNNTHEFKLLFLSVITDLEKTSTYIGKLRCARELKYLFLYENVLVKSS-----TL    | 1328 |               |
| MEC1 | -----KKSIIISALAQISICL-----QTGLGLKEV-RYEAFCRWHLVVRHLNDE        | 960  | <b>A929T</b>  |
| ATR  | -----KH-VSSVRVKMMTTL-----RTGLRFKDDFPELCCRAWDCFVRCLDHA         | 1206 |               |
| ATM  | AFVLRDVIYTLI-HYINQRPSCI---MDV-SLRSFSLCCDLLSQCQTAVTYCKDALEN    | 1515 |               |
| TEL1 | NFIIIRLSKFLIDTQIHDEVITIFSSLLNLADKNTEIEPSLPNLFCKIFI-YLRENK--   | 1385 |               |
| MEC1 | ELSTVIDSLIAFILQKWSEFNGKLRNIVYSILDTL---IKEKSDLILKPKYTTLA----   | 1013 |               |
| ATR  | CLGSLLSHVIVALPLIH-IQPKETA---AIFHYL---IENRDAVQDFLH-EIYF----    | 1254 |               |
| ATM  | HLHVIVGTIPLVYE-----QVEVQKQVLDLLKYL---VIDNKN---ENLYITIKLLDP    | 1564 |               |
| TEL1 | QLSPSFQQAIKLLEH-----RDLIK---IKTWKYFLDAIFGNIVQ---DDIYENTELLDA  | 1434 |               |
| MEC1 | LVGKPELGLIARDGQFARMVKNIRSTTD-LIPIFANNLKSS---NKYVINQNLDDIEVYL  | 1069 |               |
| ATR  | LPDHPPELKKIKAV--LQYRKETSESTD-LQTTQLQSMKAIQHENVVDRIHALTSKQETL  | 1311 |               |
| ATM  | FPDHVVFKDLRITQKIKYSRGPFSLLEEINHFVLSVSYDA---LPLTRLEGLKDLRRQL   | 1621 |               |
| TEL1 | SDC--GVDDVVLVLLFSYARRPVAS-----KIGC-----                       | 1462 |               |
| MEC1 | R-RKQTERSIDFTPCKVQTSIDITLVLGALLDTSK--FRNLDKDLCEKCAKCSIMIGVL   | 1126 | <b>G1124N</b> |
| ATR  | Y--KNQEKLIKATDSETVEPIISQLVTVLLKGCQD-----ANSQARLLCGECLGELGAI   | 1364 |               |
| ATM  | ELHKDQMVDIRASQDNPDGIMVKLVNLLQLSKMAINHTGEKEVLEAVGSCLEGEVGP     | 1681 |               |
| TEL1 | SLSKAAANILKH--HVPKEYLSKNFKLWFAALSRRILQEQVQRER---STNFNNEVHLK   | 1517 |               |
| MEC1 | DVTKHEFKRTTYS-----ENEVDLNSVQTIKFLIWINVINDILVPAFWQSENPSKQLFVA  | 1181 |               |
| ATR  | DPGRLDFTTETQ-----GKD-FTFVTGVEDSSPAYGLLMELTRAYLAYADNSRAQDSAA   | 1418 |               |
| ATM  | DFSTIAIQHS-----KDASYTKALKLPEDKELQWT-FI-MLT---YLNNT-----       | 1721 |               |
| TEL1 | NFEMV-FRHPQPHMIYQRISTFNKEAELYDSTEVFFISEC-IIT---YLVGY-----     | 1565 |               |
| MEC1 | LVIQESLKYCGLSSESWDMNHKELYPNEAKLWEKFNVS---SKTTIYPLLSLYLA----   | 1234 |               |
| ATR  | YAIQELLS-----IYDCREMETNGPGHQLWRRFPEH---VREILEPHLNTRYKSSQ--    | 1466 |               |
| ATM  | -LVEDCVKV--RRAAVTCLKNILATKTGHSFWEIYKMTTDPMLAYLQPPRTRSRKFFLEV  | 1778 |               |
| TEL1 | -SIG-----NSESEFCFRDNIMNENKDKVAPLD---K-DVLNAIYPL-----          | 1602 |               |
| MEC1 | -----QSWKEYVP-LKYPNNFKEGYKIWVKRFTLDLLKTGT-TENHPLHVFSLLIREDD   | 1287 |               |
| ATR  | ---KSTDWVSGVKK-PIYL-SKLGSNFAEWSASWAGYLITKVRHDLASKIFTCSSIMMKHD | 1521 |               |
| ATM  | RFDKENPFEGLD--DINLWIPLSENHDIWIKTLTCAFLDSGGT--KCEIQLLKPCEVK    | 1834 |               |
| TEL1 | ----ANF-GMESFICDTYLSVNEPYNLWLSKFAARSLIHQISF--NIPPIVCLYPLCKGS  | 1655 |               |
| MEC1 | GSLSNFLLPYISLDIIKAKE---GTPYADILNGIIEFDSIFTCNLEG-----MN        | 1335 |               |
| ATR  | FKVTIYLLPHILVYVLLGCNQEDQQEVYAEIMAVLK--HDDQHTIN-----TQ         | 1567 |               |
| ATM  | TDFCQTVLPLYIHDIL--LQD--TNESWRNLLSTHV---QGFFTSCLRHSQTSRSTTPA   | 1887 |               |
| TEL1 | TAFCELVLTDLFFLSTTYDPK--SCLNWSNRIFTQI--AMLLHV-----KD-----      | 1697 |               |
| MEC1 | NLQVDS-----LRMCYESIFRVFEYCKKWATEFKQNSKLGHTFII-----KD          | 1378 |               |
| ATR  | DIASDL-----CQLSTQTVFMSLDLHTQWARHKFQALKAKECPHKSNNRNVDSMVS      | 1619 |               |
| ATM  | NLDSESEHFRCCLDKKSQRTMLAVVDMRQKRPSSGTIF-----                   | 1928 |               |
| TEL1 | ---SEI-----KLKMLFNVIKMRMGRSCKERNCL-----                       | 1724 |               |
| MEC1 | TKTNTMLLRIDEFLRTPSDLLAQRSLETFSEFSALEYLQCYRQNPND-----          | 1427 | <b>S1413F</b> |
| ATR  | TVDYEDYQSVTRFLDLIPQDTLAVASFRSKAYTRAVMHFESFITEKKQN-----        | 1668 |               |
| ATM  | -----NDAFWLDLNYLEVAKVAQS-CAAHFTALLYAEIYADKKSMDQEKRSLAFE       | 1978 |               |
| TEL1 | -----RIYSSLDLQEQICQISLKIKEFKFGYLLFEEMNM-----PN--IRE---        | 1762 |               |
| MEC1 | -----KNQNGQLLKNLQITTYEEIGDIDSLDGVLRTFAT-GNLVSKIEEL            | 1470 |               |
| ATR  | -----IQE---HLGFLQKLYAAMHEPDGVAGVSAIRKAEFSLKEQILEH             | 1709 |               |
| ATM  | EGSQSTTISLSEKSKEETGISLQDLLEIYRSIGEPDSLYGCGGKMLQPITRLRTHYEH    | 2038 |               |
| TEL1 | -----MN---INTLQKIYECINDGDFLAGLPVPHSIEGVLNSINRID               | 1801 |               |
| MEC1 | QYSENWKLQDC---FNVLGKFSDEPKT-TTRMLKSMYDHQLYSQIISNSFSHSSDGEIS   | 1526 |               |
| ATR  | ESLGLLRDATA---YDRAIQLEPDQIIHYHGVVKSMLGLGQLSTVI-----           | 1753 |               |
| ATM  | E--AMWGKALVT---YDLETAIP--SSTRQAGIQALQNLGLCHI-----             | 2076 |               |
| TEL1 | S--DTWKRFLFNNADFDANYTTS--LEEEKESLIKATEDSGFYGL-----            | 1842 |               |
| MEC1 | LSPDVKWEYSIGLEAANLECNVQTLKNWVEQIESLRNIDDREVLQYNIKALIAISNED    | 1586 | <b>G1546S</b> |
| ATR  | -----TQVNGVHANRSEWDELNTYRVEAA-WKLSQWDLVENYLAADGKS             | 1797 |               |
| ATM  | -----LSVYLKGLDYENKDWCPLEELHYQAA-WRNMQWDHCTSVSKEVEG-           | 2121 |               |
| TEL1 | -----TSLLESRLSGSS-DVYKWNLELG-----DWKLLTPKVVD---               | 1875 |               |
| MEC1 | PL-----RTQKYIHNSFRLLGTNFITSS-----KETTLLKQNL                   | 1621 |               |
| ATR  | TTWSVRLG-QLLSAKKRDIATFYDSLKLVRAEQIVPLSASF-----ERGSYQRGYEYI    | 1851 |               |

|      |                                                                  |      |        |
|------|------------------------------------------------------------------|------|--------|
| ATM  | TSYHESLYNALQSLRD-REFSTFYESLKYARVKEVEEMCKRSLESVYSL-----YPTL       | 2173 |        |
| TEL1 | -SKAKGLYYAIKNLPQDVGFA-----EKSLEKSLTIFDSRQHFFISQTEWM              | 1920 |        |
| MEC1 | MKLHSLYDLS-----FLSSAKDKFEYKSNNTTILDYRMER-IGADVPNHYYILSMRKSFD     | 1674 |        |
| ATR  | VRLHMLCELEHSIKPLFQHS PGDSQEDS--LNWVARLEM-TQNSYRAKEPILALRRALL     | 1908 |        |
| ATM  | SRLQAIGELE-SIGELFSRSVTHRQLSEVYIK-WQKHSQLLKDSDFSFQEPIMALRTVIL     | 2231 |        |
| TEL1 | DTLNAIEFI-KIAAIPQD-VTS--FPQTLMSIMKADKERLNTIDFYDHKTTLKSRTLM       | 1976 |        |
|      | *: : : : . : : : * :                                             |      |        |
| MEC1 | QLKMNEQADADLGKTFFFTLA-----QLARNNARL-----DIA                      | 1706 |        |
| ATR  | SLNKRDPDYNEMVGECLWQSA-----RVARKAGHH-----QTA                      | 1940 |        |
| ATM  | EILMEKEMDNSQRECIKDILT KHLVEL-----SILARTFKNTQL-                   | 2270 |        |
| TEL1 | NVLSRNSLDE-NVKCSKYLRGSI IQLANYVQLA TANGAPQDALRNATLMSKTVKNI AKL   | 2035 |        |
|      | .: . . : :                                                       |      |        |
| MEC1 | S-----ESLMHCLERLPPQAELEFAEILWKQGENDRALKIVQEIHEKY-QENSSV--        | 1755 | A1726V |
| ATR  | Y-----NALLNAGESRLAELYVERAKWLWSKGDVHQALIVLQKGVLCFPENETPPE         | 1992 |        |
| ATM  | --PERAIFQIKQYNSVSCGVSEWQLEEAQVFWAKKEQSLALSILKQMIKKLDASCA----     | 2324 |        |
| TEL1 | YDDPSVVSQIEKLAS-----FTSANALWESREYKAPVMIMRDLA QNEKNISESIL         | 2086 |        |
|      | . : * : . : : . .                                                |      |        |
| MEC1 | -----NARDRAAVLLKFTEWLDLSNNSASEQI IKQYQDIF-QIDSKWD-----           | 1797 |        |
| ATR  | GK-----NMLIHGRAMLLVGRFMEETANFESNAIMKKYKDVT-ACLPEWE-----          | 2036 |        |
| ATM  | ANNPS--LKLTYTECLRVCGNWLAE TCLENPAVIMQTYLEKAVEVAGNYDGESSDEL RNG   | 2382 |        |
| TEL1 | YDDFKLLINVPMDQIKARLVKWSSESRLPEAAAIYEKIIV-----NWDINVED--HES       | 2137 |        |
|      | . : : * : : : .                                                  |      |        |
| MEC1 | --KPYYSICL LYSRLLERKKAEGYITN-----GRFEYRA-----                    | 1829 | G1804N |
| ATR  | --DGHFYLAKEYYDKLMPMVTDNKMEKQ-----GDL-----                        | 2064 |        |
| ATM  | KMKAFLSLARFSDTYQYRIENY-----MKSSEFENKQALLKRAKEEVGLLREHK           | 2431 |        |
| TEL1 | CSDVFYTLGSLDEQAQKLRNSGEIEDREHRSYTGKSTLKALELIYKNTKLPENERKDAK      | 2197 |        |
|      | . . : . .                                                        |      |        |
| MEC1 | I---SYF---LLAF-----E---KNTAKVRENLPKVITF                          | 1854 |        |
| ATR  | I---RYI---VLHF-----GRSLQYGNQFIYQSMRMLTL                          | 2093 |        |
| ATM  | IQTNRYTVKQRELELDELALRALKEDRKRFLCKAVENYINCLLSGEE-HDMWVFRCLCSL     | 2490 |        |
| TEL1 | RHYNR---VLLQYNRDESVLKALLLQKEKFLWHALHFYLN TLVFSNRYDNDI IDKFCGL    | 2253 |        |
|      | . : : .                                                          |      |        |
| MEC1 | WLDIAAASISEAPGNRKEML--SKATEDICSHVEEALQHCPTYIWFVLTQLLSRLLHS-      | 1911 | A1859V |
| ATR  | WLDYGTKAYEWKAGRSRDRVQMRNDLGKINKVITEHTNYLAPYQFLTAFS QLISRICHS-    | 2152 |        |
| ATM  | WLE-----NSGVSEVNGMMKRDMKIPYKFLPLMYQLAARMGTM                      | 2531 |        |
| TEL1 | WFE-----NDDNSKINQLLYKEIGTIPSWKFLPWNQIASKISME-                    | 2293 |        |
|      | *: : . : : . * : : : .                                           |      |        |
| MEC1 | --HQSSAQIIMHILLSLAVEYPSHILWYITALVNSNSSKRVLRGKHIL-----E           | 1958 |        |
| ATR  | --HDEVFVVLMEIIAKVFLAYPQQAMMMTAVSKSSYPMRVNRCKEIL-----N            | 2199 |        |
| ATM  | MGGIGFHEVLNLLISRISMDHPHHTLFII LALA-----NANRDEF LTKPEVARRSRITK    | 2585 |        |
| TEL1 | --ENEFAQPLQLTMKRLLYKLPYDSLVSMSILL--YEKQSNKDTNIS-----Q            | 2338 |        |
|      | : : : * . : : : . : : :                                          |      |        |
| MEC1 | KYRQHSQNP-----HDLVSSALDLTKALTRVCLQDVKS-IT                        | 1993 | C1985Y |
| ATR  | KAIHMKKS L-----EKFVGDATRLTDKLELCNKPVDG-SS                        | 2234 |        |
| ATM  | NVPKQSSQLDEDRTEAANRIICTIRS-----RRPQMVRSVEALCDAYIILANLDATQWKT     | 2640 |        |
| TEL1 | KI-----QAVKKILLELQGYDRGAFAKYLLPQVQFCEMSVELANLKFVQNTK             | 2386 |        |
|      | : . : . . : .                                                    |      |        |
| MEC1 | SRSGKSLEKDFKFDNMVA---PSAMVVPVRKNLDIISPL--ES-NSMRGYQPPFRP-VVS     | 2045 |        |
| ATR  | STL--SMTSHFKMLKLVVEATFSEIILPQSVMIPTLPSILGTHANHASHEPFGHWAY        | 2292 |        |
| ATM  | QRKGINIPAD-----QPITKLNLEDVVPTMEIKVDHT-----GEYGNLVT               | 2682 |        |
| TEL1 | TLRLANLKIG-----QYWLKQLNMEKLP LPTSNFTVKSSAD----GRKARPYI           | 2430 |        |
|      | : .                                                              |      |        |
| MEC1 | IIRFGSSYKVFSSLKKPKQLNII GSDGNIYIGIMCKK--EDVRQDNQYMFATMTDFLLSK    | 2103 |        |
| ATR  | IAGFDDMVEILASLQPKKISLKGSDGKFYIMMCKP-KDDLKDCRLMEFNSLINKCLRK       | 2351 |        |
| ATM  | IQSFKAEFRLAGGVNLPKIIDCVGSDGKERRQLVKG-RDDLQDAVMMQVVFQMCNTLLQR     | 2741 |        |
| TEL1 | VSVNETVGIITTTGLSLPKIVTFNISDGTQKALMKGSNDDL RQDAIMEQVVFQVNVKVLQN   | 2490 |        |
|      | : . . * : * * : * : * : * : *                                    |      |        |
| MEC1 | DIASRKRSLGINIYSVLSLREDCGILEMVPNVVTLRSILSTKYESLKIKYSLKS----L      | 2158 | G2127E |
| ATR  | DAESRRRELHIRTAVIPLNDECGLIEWVNNTAGLRPIILTKLYKEKGVYMTGKE----L      | 2406 | E2130K |
| ATM  | NETRKRRLTICTYKVVPLSQRSGVLEWCTGTVPIGEFLVNNEDGAHKRYRPNDFSAFQC      | 2801 |        |
| TEL1 | DKVLRNLDLGI RTYKVVPLGPKAGIIEFVANSTSLHQILSKLHTND-----KITFDQA      | 2543 |        |
|      | : * . * * * * : * : * : . : *                                    |      |        |
| MEC1 | HDRWQ-H--TAADGKLE-FYMEQVDKFPPIILYQWFLENFPDPINWFNARNTYARSYAVMA    | 2214 |        |
| ATR  | RQCML-PKSAALSEKLVFRELLPRHPPIFHEWFLRTPDPTSWSYSSRSAYCRSTAVMS       | 2465 |        |
| ATM  | QKKMMEVQKKSFEKYE-VFMDVCQNFQVFRYFCMEKFLDPAIWFEEKRLAYTRSVATSS      | 2860 |        |
| TEL1 | RKGMKAVQTKSNEERLK-AYLKITNEIKPQLRNFDFSFPDPLDWFEAKKTYTKGVAASS      | 2602 |        |
|      | . : : : . : * : : * * * : * : * : *                              |      |        |
| MEC1 | MVGHILGLGDRHCENI LLDIQTGKVLHVDFDCLFEKGRKLPVPEIVPFR LTPNLLDALGI   | 2274 |        |
| ATR  | MVGYILGLGDRHGENILFDSL TGEVHVDFNCLFNKGETFEVPEIVPFR LTHNMVNGMGP    | 2525 |        |
| ATM  | IVGYILGLGDRHVQNILINEQS AELVHIDLGVAFEQGGKILPTPETVFPFR LTRDIVDGMGI | 2920 |        |
| TEL1 | IVGYILGLGDRHLNILLDCSTGEP IHI DLGIAFDQKLLPIPELVFPFR LTRDIVDGFVG   | 2662 |        |
|      | :::***** :***: .: :*:*. *::: : ** ***** ::::.*                   |      |        |
| MEC1 | IGTEGTFKKSSEVTLALMRKNEVALMNVIETIMYDRNMDHSIQ-----                 | 2317 | G2279K |
| ATR  | MGTEGLFRACEVTMLRMRDQREPLMSVLKTLFLHDPLVEWSKPVKGHSAKPLNETGEVNV     | 2585 |        |

|      |                                                               |      |               |
|------|---------------------------------------------------------------|------|---------------|
| ATM  | TGVEGVFRRCCEKTMEVMRNSQETLLTIVEVLLYDPLFDWTMNPALKALYLQQRPEDETEL | 2980 |               |
| TEL1 | TGVDGLFRRCERVYAVLRKDYVKVMCVLNILKWDPLYSWVMSPVKKYEHLFEEHEITN    | 2722 |               |
|      | *.:* *::..* . ::*.. ::::: * .                                 |      |               |
| MEC1 | -----KALKVLRNKIRGIDPQDGLVLSVAGQTETLIQE                        | 2350 | <b>S2339N</b> |
| ATR  | -----EKAKTHVLDIEQRLQGVIKTRNRVTGLPLSIEGHVHYLIQE                | 2626 |               |
| ATM  | HPTLNADDQECKRNLSDIDQSFNKVAERVLMLRQEKLKGV--EEGTVLSVGGQVNLLIQQ  | 3038 |               |
| TEL1 | FDN-----VSKFISNDRNENQESYRALKGVEEKL-----MGNGLSVESSVQDLIQQ      | 2769 |               |
|      | :. : * **: . . . ***:                                         |      |               |
| MEC1 | ATSEDNLSKMYIGWLPFW 2368                                       |      |               |
| ATR  | ATDENLLCQMYLGWTPYM 2644                                       |      |               |
| ATM  | AIDPKNLSRLFPGWKAWV 3056                                       |      |               |
| TEL1 | ATDPSNLSVIYMGWSPFY 2787                                       |      |               |
|      | * . . * . :: ** :                                             |      |               |
